# Supplementary material for: Oxygen-tolerant coenzyme A-acylating aldehyde dehydrogenase facilitates efficient photosynthetic n-butanol biosynthesis in cyanobacteria
Source: Royal Society of Chemistry journal article supplement (doi:10.1039/c3ee41405a), 2013-01-01
Supplement: c3ee41405a.pdf [file c3ee41405a.pdf]

**Supplementary Information for “Oxygen-tolerant Coenzyme A-acylating aldehyde dehydrogenase facilitates efficient photosynthetic n-butanol biosynthesis in cyanobacteria”**

**Data used for Figure 6A**

The following table shows calculation for converting productivity reported in the literature into molar productivity

| Units              | Titer<br>mg/L | Time<br>days | Productivity<br>mg/L/d | Molar mass<br>mmol/mg | Molar productivity<br>μmol/L/d |
|--------------------|---------------|--------------|------------------------|-----------------------|--------------------------------|
| <i>n</i> -butanol  | 402           | 12           | 33.5                   | 74.12                 | 452                            |
| fatty acid         | 197           | 2            | 98.5                   | 172 - 284             | 411 <sup>a</sup>               |
| 3-hydroxy-butyrate | 533.4         | 21           | 25.4                   | 104.1                 | 244                            |
| acetone            | 36            | 4            | 9                      | 58.08                 | 155                            |
| fatty alcohol      | 0.20044       | 18           | 0.011                  | 242 - 270             | 0.0422 <sup>b</sup>            |

<sup>a</sup> Fatty acids of different chain length and saturation were produced. The following table calculates the molar productivity of each fatty acid

| Fatty acid | percentage | productivity<br>mg/L/d | molar mass<br>mmol/mg | Molar productivity<br>μmol/L/d |
|------------|------------|------------------------|-----------------------|--------------------------------|
| 10         | 0.6        | 0.6                    | 172.3                 | 3                              |
| 12         | 19.9       | 19.6                   | 200.3                 | 98                             |
| 14         | 20.9       | 20.6                   | 228.4                 | 90                             |
| 16         | 43.3       | 42.7                   | 256.4                 | 166                            |
| 18:3       | 1.4        | 1.4                    | 278.4                 | 5                              |
| 18:2       | 1.1        | 1.1                    | 280.5                 | 4                              |
| 18:1       | 1.5        | 1.5                    | 282.5                 | 5                              |
| 18         | 11.3       | 11.1                   | 284.5                 | 39                             |
| Total      | 100        |                        |                       | 411                            |

<sup>b</sup> Fatty alcohols of different chain length and saturation were produced. The following table calculates the molar productivity of each fatty alcohol.

| Fatty alcohol | percentage | productivity<br>mg/L/d | molar mass<br>mmol/mg | Molar productivity<br>μmol/L/d |
|---------------|------------|------------------------|-----------------------|--------------------------------|
| 16            | 20         | 0.0022                 | 242.0                 | 0.00920                        |
| 18            | 80         | 0.0089                 | 270.0                 | 0.03299                        |
| Total         | 100        | 0.0111                 |                       | 0.0422                         |

\*Note productivity of 0.0111 mg/L/d was calculated based on the reported production of 200 μg/L over 18 days.

The following table shows calculation for converting productivity reported in the literature into carbon molar productivity

| Units              | Molar productivity<br>$\mu\text{mol/L/d}$ | Numbers of carbons | Carbon molar productivity<br>$\text{mmol/L/d}$ |
|--------------------|-------------------------------------------|--------------------|------------------------------------------------|
| <i>n</i> -butanol  | 452                                       | 4                  | 1.8                                            |
| fatty acid         | 411                                       | 10 – 18            | 6.1                                            |
| 3-hydroxy-butyrate | 244                                       | 4                  | 1.0                                            |
| acetone            | 155                                       | 3                  | 0.5                                            |
| fatty alcohol      | 0.0422                                    | 16 – 18            | 0.0024                                         |
